# Supplementary material for: An electrochemically activated graphite electrode with excellent kinetics for electrode processes of V(ii)/V(iii) and V(iv)/V(v) couples in a vanadium redox flow battery
Source: Royal Society of Chemistry journal article supplement (doi:10.1039/c4ra09777g), 2014-01-01
Supplement: c4ra09777g1.pdf [file c4ra09777g1.pdf]

# Electrochemically activated graphite electrode with excellent kinetics of electrode processes of V(II)/V(III) and V(IV)/V(V) couples in a vanadium redox flow battery

Huijun Liu<sup>\*a</sup>, Lingxu Yang<sup>b</sup>, Qian Xu<sup>b</sup> and Chuanwei Yan<sup>a</sup>

## Supporting Materials

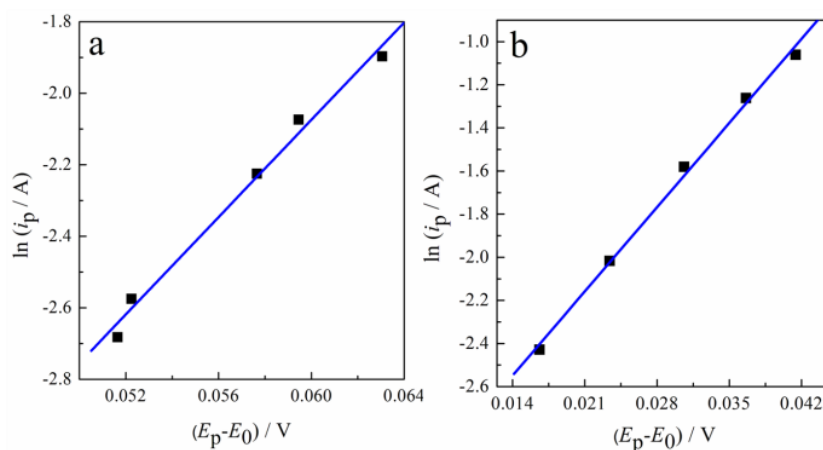

Fig. S1. The plots of  $\ln(i_p)$  versus  $(E_p - E_0)$  for the oxidation of V(IV) on the pristine graphite electrode (a) and EAGE (b) in  $2 \text{ mol} \cdot \text{dm}^{-3} \text{ H}_2\text{SO}_4 + 2 \text{ mol} \cdot \text{dm}^{-3} \text{ VOSO}_4$  solution

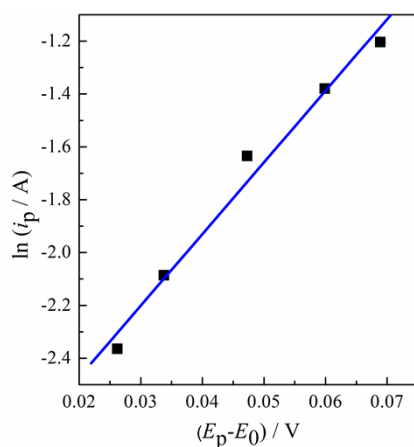

Fig. S2. The plot of  $\ln(i_p)$  versus  $(E_p - E_0)$  for the reduction of V(III) on EAGE in  $2 \text{ mol} \cdot \text{dm}^{-3} \text{ H}_2\text{SO}_4 + 2 \text{ mol} \cdot \text{dm}^{-3} \text{ V(III)}$  solution
